# Supplementary material
Source: PubMed Central journal article supplement (PMC3816375)
Supplement: NIHMS415939-supplement-Supplement1.pdf [file NIHMS415939-supplement-Supplement1.pdf]

## Supplementary Appendix

This appendix has been provided by the authors to give readers additional information about their work.

Supplement to: Anasetti C, Logan BR, Lee SJ, et al. Peripheral-blood stem cells versus bone marrow from unrelated donors. *N Engl J Med* 2012;367:1487-96. DOI: 10.1056/NEJMoa1203517

## Appendix

Supplement to: Peripheral blood stem cells versus bone marrow from unrelated donors: results of Blood and Marrow Transplant Clinical Trials Network protocol 0201, a phase III, prospective, randomized trial. New England Journal of Medicine, 2012

### Table of Contents

|                                                                                  | Page |
|----------------------------------------------------------------------------------|------|
| Description and responsibilities of the BMT CTN and the 0201 Study Protocol Team | 2    |
| Table S1A: Grade 3-5 toxicities in the first 100 days by study arm               | 5    |
| Table S1B: Grade 3-5 toxicities between 100 days and 1 year by study arm         | 6    |
| Table S2: BMT CTN 0201 Transplant Center List and Principal Investigators        | 7    |
| Table S3: BMT CTN 0201 Donor Center List and Principal Investigators             | 8    |

## **Description and responsibilities of the BMT CTN and the 0201 Study Protocol Team.**

### 1. Blood and Marrow Transplant Clinical Trials Network (BMT CTN) description:

The BMT CTN is funded through two divisions at the National Institutes of Health: The National Heart, Lung, and Blood Institute ([NHLBI](#)); and, The National Cancer Institute ([NCI](#)). The BMT CTN Data and Coordinating Center ([DCC](#)) maintains continuity of operations and facilitates effective communications. The DCC effort is a collaboration between:

- Center for International Blood and Marrow Transplant Research ([CIBMTR](#)) at the Medical College of Wisconsin
- National Marrow Donor Program ([NMDP](#))
- The EMMES Corporation ([EMMES](#))

### 2. Data and Coordinating Center Principal Investigators:

Mary M. Horowitz  
Shelly L. Carter  
Dennis L. Confer

### 3. NIH Officers

Nancy DiFronzo (NHLBI)  
Elizabeth Wagner (NHLBI)  
William Merritt (NCI)  
Roy Wu (NCI)

### 4. BMT CTN 0201 Protocol Team Investigators and Coordinators:

Claudio Anasetti  
Brent R. Logan  
Stephanie J. Lee  
Edmund K. Waller  
Daniel J. Weisdorf  
John R. Wingard  
Stephen Couban  
Paolo Anderlini  
William I. Bensinger  
Susan F. Leitman  
Scott D. Rowley  
Shelly L. Carter  
Catchada Karanes  
Mary M. Horowitz  
Dennis L. Confer  
Colleen Allen  
Colleen Colby  
Cathy Gurgol  
Kristin Knust  
Amy Foley

Roberta King  
Phyllis Mitchell

5. Consortia principal investigators and other institutional investigators who co-authored the manuscript:

Stephen Couban  
Michael A. Pulsipher  
Gerhard Ehninger  
Laura Johnston  
Shakila P. Khan  
Richard T. Maziarz  
John M. McCarty  
Shin Mineishi  
David L. Porter

6. Protocol Medical Officer:

Christopher Bredeson

7. Protocol Data Review Committee:

Claudio Anasetti  
Stephanie Lee  
Edmund K. Waller  
John R. Wingard  
Corey S. Cutler  
Peter Westervelt  
Ann Woolfrey

8. Data Analysis Team:

Brent R. Logan  
Shelly L. Carter  
Stephanie J. Lee  
Edmund K. Waller

9. Primary authors of the paper:

Claudio Anasetti  
Brent R. Logan  
Stephanie J. Lee

All the other authors have contributed editing the paper to the present format.

10. The Publication Committee of the BMT-CTN that approved publication of this manuscript:

1. Edward Stadtmauer (through December 31<sup>st</sup>, 2011)
2. John Wingard\* (January 1, 2012 - )
3. Julie Vose
4. Hillard Lazarus
5. Mort Cowan
6. John Wingard
7. Peter Westervelt
8. Mark Litzow
9. Roy Wu
10. Nancy Geller
11. Shelly Carter\*
12. Dennis Confer\*
13. Mary Horowitz\*
14. Nancy Poland

**\*Noted by the asterisk are authors of this paper who did not review the manuscript in the capacity of publication committee member.**

**Table S1A: Grade 3-5 Toxicities in the first 100 days**

| <b>Toxicity</b>                                 | <b>Bone Marrow<br/># of patients<br/>experiencing<br/>events (%)</b> | <b>Peripheral<br/>Blood<br/># of patients<br/>experiencing<br/>events (%)</b> |
|-------------------------------------------------|----------------------------------------------------------------------|-------------------------------------------------------------------------------|
| Grade 3-5 Hypotension                           | 29 (11.0%)                                                           | 29 (11.1%)                                                                    |
| Grade 3-5 Left Ventricular Systolic dysfunction | 12 (4.5%)                                                            | 7 (2.7%)                                                                      |
| Grade 3-5 Cardiac Arrhythmia                    | 17 (6.4%)                                                            | 12 (4.6%)                                                                     |
| Grade 4-5 HUS/TTP/TMA                           | 8 (3.0%)                                                             | 9 (3.4%)                                                                      |
| Grade 3-5 Mucositis                             | 92 (34.8%)                                                           | 83 (31.7%)                                                                    |
| Grade 4-5 Hemorrhage                            | 6 (2.3%)                                                             | 8 (3.1%)                                                                      |
| Grade 3-5 Hemorrhagic cystitis                  | 18 (6.8%)                                                            | 13 (5.0%)                                                                     |
| Grade 3-5 Somnolence                            | 33 (12.5%)                                                           | 32 (12.2%)                                                                    |
| Grade 3-5 Seizure                               | 8 (3.0%)                                                             | 1 (0.4%)                                                                      |
| Grade 4-5 Vascular Leak Syndrome                | 3 (1.1%)                                                             | 5 (1.9%)                                                                      |
| Grade 3-5 Osteonecrosis                         | 2 (0.8%)                                                             | 3 (1.1%)                                                                      |
| Grade 3-5 Vaginitis                             | 2 (0.8%)                                                             | 0 (0.0%)                                                                      |
| Grade 3-5 Hypoxia                               | 52 (19.7%)                                                           | 54 (20.6%)                                                                    |
| Grade 3-5 Dyspnea                               | 52 (19.7%)                                                           | 49 (18.7%)                                                                    |
| Grade 3-5 Pulmonary fibrosis                    | 5 (1.9%)                                                             | 7 (2.7%)                                                                      |
| Renal failure severe enough to warrant dialysis | 21 (8.0%)                                                            | 19 (7.3%)                                                                     |
| Received dialysis                               | 13 (4.9%)                                                            | 10 (3.8%)                                                                     |
| Experienced seizures                            | 12 (4.5%)                                                            | 6 (2.3%)                                                                      |
| Abnormal liver function                         | 91 (34.5%)                                                           | 89 (34.0%)                                                                    |

**Table S1B: Grade 3-5 Toxicities between 100 days and 1 year**

| <b>Toxicity</b>                                 | <b>Bone Marrow<br/># of patients<br/>experiencing<br/>events (%)</b> | <b>Peripheral Blood<br/># of patients<br/>experiencing<br/>events (%)</b> |
|-------------------------------------------------|----------------------------------------------------------------------|---------------------------------------------------------------------------|
| Grade 4-5 HUS/TTP/TMA                           | 5 (2.2%)                                                             | 4 (1.8%)                                                                  |
| Grade 4-5 Hemorrhage                            | 6 (2.7%)                                                             | 6 (2.7%)                                                                  |
| Grade 3-5 Osteonecrosis                         | 7 (3.1%)                                                             | 9 (4.0%)                                                                  |
| Grade 3-5 Hypoxia                               | 41 (18.2%)                                                           | 37 (16.4%)                                                                |
| Grade 3-5 Dyspnea                               | 51 (22.7%)                                                           | 41 (18.1%)                                                                |
| Renal failure severe enough to warrant dialysis | 15 (6.8%)                                                            | 11 (5.0%)                                                                 |
| Received dialysis                               | 8 (3.7%)                                                             | 3 (1.4%)                                                                  |
| Abnormal liver function                         | 63 (28.8%)                                                           | 59 (26.7%)                                                                |

**Table S2: BMT CTN 0201 Transplant Centers and Principal Investigators**

| <b>Transplant Center</b>                                          | <b>Principal Investigator(s)</b>                  |
|-------------------------------------------------------------------|---------------------------------------------------|
| Baylor College of Medicine/The Methodist Hospital                 | Robert Krance, MD*; George Carrum, MD             |
| Baylor University Medical Center                                  | Edward Agura, MD                                  |
| City of Hope National Medical Center                              | Auayporn Nademanee, MD                            |
| Cohen Children's Hospital*                                        | Indira Sahdev, MD                                 |
| DFCI/Brigham & Women's                                            | Corey Cutler, MD, MPH, FRCPC                      |
| Duke University Medical Center - Adult BMT                        | Mitchell Eric Horwitz, MD; Joanne Kurtzberg, MD   |
| Emory University                                                  | Edmund K. Waller, MD                              |
| Fred Hutchinson Cancer Research Center                            | Ann Woolfrey, MD                                  |
| Hackensack Univ. Medical Center (A)                               | Scott Rowley, MD                                  |
| Hackensack Univ. Medical Center (P)*                              | Joel Brochstein, MD                               |
| Hamilton Health Sciences - McMaster Site                          | Brian Leber, MD; Parveen Wasi, MD                 |
| Hopital Maisonneuve-Rosemont - Montreal                           | Jean Roy, MD                                      |
| Indiana BMT at Beech Grove                                        | Jan Jansen, MD, PhD                               |
| Loyola University Medical Center                                  | Patrick Joseph Stiff, MD                          |
| Mayo Clinic – Rochester*                                          | Shakila Khan, MD                                  |
| Ohio State/Arthur G. James Cancer Hospital                        | Steven Devine, MD                                 |
| Oregon Health & Science University (A)                            | Richard Maziarz, MD                               |
| Oregon Health & Science University (P)*                           | Eneida Nemecek, MD, MPH                           |
| Ottawa Hospital - General Campus                                  | Lothar Huebsch, MD                                |
| Queen Elizabeth II Health Sciences Centre - Halifax               | Stephen Couban, MD                                |
| Roswell Park Cancer Institute                                     | Philip McCarthy, MD                               |
| Stanford Hospital and Clinics                                     | Laura Johnston, MD                                |
| Texas Transplant Institute                                        | Paul Shaughnessy, MD                              |
| Tom Baker Cancer Centre - Calgary                                 | Lynn Savoie, MD                                   |
| UCSD Medical Center                                               | Edward Ball, MD                                   |
| University of Alabama at Birmingham                               | William Vaughan, MD, MBA                          |
| University of CA, SF (Pediatric BMT)*                             | Morton Cowan, MD; Bilijana Horn, MD               |
| University of Florida College of Medicine (Shands)                | John Wingard, MD                                  |
| University of Iowa Hospitals and Clinics                          | Margarida Silverman, MD                           |
| University of Kansas Hospital                                     | Sunil Abhyankar, MD; Joseph McGuirk, MD           |
| University of Maryland Medical Systems - Greenebaum Cancer Center | Saul Yanovich, MD                                 |
| University of Michigan Medical Center                             | James Ferrara, MD                                 |
| University of Minnesota                                           | Daniel Weisdorf, MD                               |
| University of Nebraska Medical Center                             | Edward Faber, Jr., DO, MS                         |
| University of Oklahoma Medical Center                             | George Selby, MD*; Laura Marie Rooms, MD          |
| University of Pennsylvania Cancer Center                          | David Porter, MD                                  |
| University of Pittsburgh Cancer Institute                         | Mounzer Agha, MD                                  |
| University of Texas/MD Anderson CRC                               | Paolo Anderlini, MD                               |
| University of Toronto - Princess Margaret Hospital*               | Jeffrey Lipton, MD, PhD, FRCPC                    |
| Utah BMT/Primary Children's Medical Center*                       | Michael A. Pulsipher, MD                          |
| Utah BMT/Univ of Utah Med School                                  | Michael A. Pulsipher, MD                          |
| Vancouver General Hospital                                        | John Shepherd, MD, FRCPC; Cindy Toze, MD          |
| Vanderbilt University Medical Center (A)                          | Adetola Kassim, MD                                |
| Vanderbilt University Medical Center (P)*                         | Haydar Frangoul, MD                               |
| Virginia Commonwealth University MCV Hospitals (A)                | John McCarty, MD                                  |
| Wake Forest University Health Sciences                            | David Hurd, MD                                    |
| Washington University/Barnes Jewish Hospital                      | John DiPersio, MD, PhD; Peter Westervelt, MD, PhD |
| Washington University/St. Louis Children's Hospital*              | Shalini Shenoy, MD                                |

\*Pediatric Blood and Marrow Transplant Consortium Centers



**Table S3: BMT CTN 0201 Donor Centers and Principal Investigators**

| <b>Donor Center</b>                               | <b>Principal Investigator(s)</b>                                  |
|---------------------------------------------------|-------------------------------------------------------------------|
| Baylor University Medical Center                  | Edward Agura, MD                                                  |
| Blood Assurance, Inc.                             | Elizabeth Culler                                                  |
| Blood Bank of San Bernardino & Riverside Counties | Frederick Axelrod, MD; Linda Chambers, MD                         |
| Blood Center of New Jersey                        | Eric Senaldi, MD                                                  |
| Blood Centers of the Pacific                      | Kim-Anh Nguyen, MD, PhD                                           |
| BloodSource                                       | Edgar Engelman, MD                                                |
| C.W. Bill Young Marrow Donor Center               | Robert Hartzman, MD                                               |
| Carter BloodCare                                  | Laurie Sutor, MD                                                  |
| Central Kentucky Blood Center                     | Larry Dickson, MD                                                 |
| City of Hope National Med Center                  | Auayporn Nademane, MD                                             |
| Community Blood Center                            | Ghada Khalife, MD                                                 |
| Community Blood Centers of South Florida, Inc.    | Bruce A. Lenex, MD                                                |
| Cook Children's Medical Center                    | Gretchen Eames, MD                                                |
| Cooperative Appalachian Marrow Donor Program      | David Sibley, MD; Peter Gale, MD                                  |
| Dana-Farber Cancer Institute                      | Joseph Antin, MD                                                  |
| DKMS                                              | Gerhard Ehninger, MD                                              |
| Florida's Blood Centers, Inc.                     | Neil R. Newberg, MD, FACP; Richard Gammon, MD; Matthew Montgomery |
| Florida's Blood Services, Inc.                    | Buff Mair, MD                                                     |
| Gulf Coast Regional Blood Center                  | Susan Rossmann, MD                                                |
| Hawaii Bone Marrow Donor Registry                 | Randal Wada, MD                                                   |
| Indiana Blood Center                              | Dan Waxman, MD                                                    |
| Inland Northwest Blood Center                     | Robert Ranlett, MD                                                |
| Iowa Marrow Donor Program                         | Margarida Silverman, MD                                           |
| James Graham Brown Cancer Center                  | Geoffrey Herzig, MD                                               |
| LifeSouth Community Blood Centers                 | Marek Fried, MD                                                   |
| Michigan Community Blood Centers                  | Elizabeth Atkinson, MD; LeeAnn Weitekamp MD                       |
| Mississippi Marrow Donor Program                  | Carolyn Bigelow, MD                                               |
| NMDP at Great Lakes Region                        | John P. Miller, MD, PhD                                           |
| NMDP at Greater New York State                    | John P. Miller, MD, PhD                                           |
| NMDP at Greater Southeast Area                    | John P. Miller, MD, PhD                                           |
| NMDP at Greater Southeast Area                    | John P. Miller, MD, PhD                                           |
| NMDP at Heart of America Donor Center             | John P. Miller, MD, PhD                                           |
| NMDP at Northern California                       | John P. Miller, MD, PhD                                           |
| NMDP at Northern Ohio and Indiana Area            | John P. Miller, MD, PhD                                           |
| NMDP at Omaha and Tulsa Area                      | John P. Miller, MD, PhD                                           |
| NMDP at Oregon/SW Washington                      | John P. Miller, MD, PhD                                           |
| NMDP at Penn-Jersey Region                        | John P. Miller, MD, PhD                                           |
| NMDP at Southern California                       | John P. Miller, MD, PhD                                           |
| NMDP at St. Paul                                  | John P. Miller, MD, PhD                                           |
| NMDP at Virginia Blood Services                   | John P. Miller, MD, PhD                                           |
| NMDP at Washington DC Metro Region                | John P. Miller, MD, PhD                                           |
| NMDP of New England                               | John P. Miller, MD, PhD                                           |
| NMDP Puerto Rico Blood Services                   | John P. Miller, MD, PhD                                           |
| Puget Sound Blood Center                          | Thomas Price, MD                                                  |
| Rhode Island Blood Center                         | Carolyn Young, MD                                                 |
| Rock River Valley Blood Center                    | Roger Hilbert, MD                                                 |
| San Diego Blood Bank                              | David Oh, MD                                                      |
| Scott & White Clinic                              | Christian Cable, MD                                               |
| Slyvan N. Goldman Center Oklahoma Blood Institute | James W. Smith, MD                                                |
| South Texas Blood and Tissue Center               | Norman D. Kalmin, MD                                              |
| St. Alphonsus Marrow Donor Registry               | Karl Schultheiss, MD                                              |
| St. Luke's MSTI                                   | Thomas Beck, MD                                                   |
| The Blood Center                                  | Michael W. Lankiewicz, MD                                         |
| The HLA Registry                                  | David Sharp, MD                                                   |
